# Supplementary material
Source: MDPI journal article supplement (https://www.mdpi.com/2673-9259/3/1/4)
Supplement: s1 [file s1]

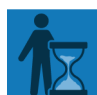

## Supplementary Materials

**Table S1.** Demographic characteristics of Komp users (N = 748) and distribution in the population \*.

| Variable                   | Survey |    | Population |       |
|----------------------------|--------|----|------------|-------|
|                            | N      | %  | N **       | % *** |
| <b>Sex:</b>                |        |    |            |       |
| Women                      | 599    | 80 | 364,532    | 55    |
| Men                        | 149    | 20 | 300,893    | 45    |
| <b>Age group:</b>          |        |    |            |       |
| >90 years                  | 218    | 29 | 44,115     | 6     |
| 86–90 years                | 234    | 31 | 71,774     | 11    |
| 81–85 years                | 185    | 25 | 113,731    | 17    |
| 76–80 years                | 51     | 7  | 176,410    | 27    |
| 70–75 years                | 42     | 6  | 259,494    | 33    |
| <70 years                  | 18     | 2  | -          | -     |
| <b>Accommodation:</b>      |        |    |            |       |
| Home                       | 480    | 64 |            |       |
| Institution                | 139    | 19 |            |       |
| Senior apartment           | 108    | 14 |            |       |
| Other                      | 21     | 3  |            |       |
| <b>Marital status</b>      |        |    |            |       |
| Married/cohabiting         | 237    | 32 |            |       |
| Unmarried                  | 78     | 10 |            |       |
| Widow/-er                  | 433    | 58 |            |       |
| <b>Place of residence</b>  |        |    |            |       |
| City/town                  | 311    | 42 |            |       |
| Settlements over 2000 pop. | 240    | 32 |            |       |
| Rural areas over 200 pop.  | 197    | 26 |            |       |

\* Retrieved 13 October 2022 from [www.ssb.no](http://www.ssb.no); \*\* Due to the age groups registered in the questionnaire, there is a slight mismatch with the age groups available from census data (i.e., 90–99 years, 85–89 years, 80–84 years, 75–79 years, and 70–74 years). \*\*\* Percentages calculated as the proportion of the total population aged 70–99 years.

**Table S2.** Distribution of Komp users' network and regular participation in different activities by age group. Percentages within age group; total, N = 748.

| Variable                    | Age Group          |                    |                    |                  | Total N<br>(% of 748) | p *    |
|-----------------------------|--------------------|--------------------|--------------------|------------------|-----------------------|--------|
|                             | ≥80 Years<br>n (%) | 81–85 Yrs<br>n (%) | 86–89 Yrs<br>n (%) | 90+ Yrs<br>n (%) |                       |        |
| <b>Network **</b>           |                    |                    |                    |                  |                       |        |
| Contact with family/friends | 75 (68)            | 145 (78)           | 191 (82)           | 166 (76)         | 577 (77)              | 0.033  |
| Activities outside the home | 22 (20)            | 40 (22)            | 42 (18)            | 38 (17)          | 142 (19)              | ns     |
| Small/no network            | 32 (29)            | 39 (21)            | 44 (19)            | 42 (19)          | 157 (21)              | ns     |
| Is mostly alone             | 54 (49)            | 62 (34)            | 85 (36)            | 108 (50)         | 309 (41)              | 0.001  |
| Live far from others        | 7 (6)              | 16 (9)             | 17 (7)             | 16 (7)           | 56 (8)                | ns     |
| <b>Meals</b>                |                    |                    |                    |                  |                       |        |
| Do their own shopping       | 32 (29)            | 83 (45)            | 79 (34)            | 41 (19)          | 235 (31)              |        |
| Get meals delivered         | 30 (27)            | 33 (18)            | 47 (20)            | 60 (27)          | 170 (23)              | <0.001 |

|                             |             |             |             |             |              |        |
|-----------------------------|-------------|-------------|-------------|-------------|--------------|--------|
| Others shop                 | 49 (44)     | 69 (37)     | 108 (46)    | 117 (54)    | 343 (46)     |        |
| <b>Physical activity **</b> |             |             |             |             |              |        |
| Organized exercise          | 13 (12)     | 18 (10)     | 13 (6)      | 18 (8)      | 62 (8)       | ns     |
| Go for a walk               | 25 (23)     | 74 (40)     | 68 (29)     | 40 (18)     | 207 (28)     | <0.001 |
| Mostly sedentary            | 68 (61)     | 97 (52)     | 134 (57)    | 138 (63)    | 437 (58)     | ns     |
| Not active outside the home | 28 (25)     | 34 (18)     | 57 (24)     | 73 (34)     | 192 (26)     | 0.006  |
| <b>Use of technology **</b> |             |             |             |             |              |        |
| Active net user             | 9 (8)       | 17 (9)      | 14 (6)      | 7 (3)       | 47 (6)       | ns     |
| Have smartphone             | 19 (17)     | 27 (15)     | 23 (10)     | 12 (6)      | 81 (11)      | 0.003  |
| Not active net user         | 34 (31)     | 62 (34)     | 71 (30)     | 60 (28)     | 227 (30)     | ns     |
| Use only Komp               | 68 (61)     | 115 (62)    | 158 (68)    | 158 (73)    | 499 (67)     | ns     |
| <b>Total</b>                | 111<br>(15) | 185<br>(25) | 234<br>(31) | 218<br>(29) | 748<br>(100) |        |

\* Pearson chi-square test. \*\* Check-all-that-apply question.
